# Supplementary material
Source: publisher figshare collection journal article supplement (https://acs.figshare.com/ndownloader/files/4781182)
Supplement: Supplementary file 1 [file 4781182]

#===============================================================================
 data_global
#===============================================================================
_audit_creation_date               02-07-2006

# 1. SUBMISSION DETAILS

_publ_contact_author_name        'Louis Ricard'
_publ_contact_author_address     
;Laboratoire DCPH
Ecole Polytechnique
Route de Saclay
F91128 Palaiseau
France
;
_publ_contact_author_email       louis.ricard@polytechnique.fr
_publ_contact_author_phone       330169334572
_publ_contact_author_fax         330169333990

_publ_contact_letter
;
     Please consider this CIF submission for publication as a new structure
     paper in Organometallics. The figures, chemical
     structure diagram (scheme), Transfert of Copyright Agreement form and
     structure factors will be sent on receipt of your acknowledgement letter
;
#===============================================================================

# 2. PROCESSING SUMMARY (IUCr Office Use Only)

_journal_date_recd_electronic     ?

_journal_date_to_coeditor         ?
_journal_date_from_coeditor       ?
_journal_date_accepted            ?

_journal_date_printers_first      ?
_journal_date_printers_final      ?
_journal_date_proofs_out          ?
_journal_date_proofs_in           ?


_journal_coeditor_name            ?
_journal_coeditor_code            ?
_journal_coeditor_notes
; ?
;

_journal_techeditor_code          ?
_journal_techeditor_notes
; ?
;

_journal_coden_ASTM               ?
_journal_name_full                ?
_journal_year                     ?
_journal_volume                   ?

_journal_issue                    ?
_journal_page_first               ?
_journal_page_last                ?

_journal_suppl_publ_number        ?
_journal_suppl_publ_pages         ?

#===============================================================================

# 3. TITLE AND AUTHOR LIST

_publ_section_title
;
 Electronic Structure and Evolution of a Terminal Butadienylphosphinidene 
 Complex.
;
# The loop structure below should contain the names  and addresses of all
# authors, in the required order  of publication. Repeat as necessary.


loop_
_publ_author_name
;
Ngoc Hoa Tran Huy a
Shaojie Hao a
Louis Ricard a
Francois Mathey b
;
_publ_author_address
;
a)Laboratoire Heteroelements et Coordination, 
CNRS UMR 7653,
DCPH Ecole Polytechnique,
F-91128 Palaiseau Cedex
France

b)UCR-CNRS Joint Research Laboratory,
Department of Chemistry, 
University of California Riverside, 
Riverside, 
CA 92521-0403
U.S.A.
;

#===============================================================================
# 4. TEXT

_publ_section_abstract
; ?
;

_publ_section_comment
; 
;
_publ_section_exptl_prep
;All structures were solved using SIR97 (Altomare et al.) and refined with 
 SHELXL97 (Sheldrick). Figures were drawn with Platon (Spek, 1990). 
;

_publ_section_references
;Altomare, A., Cascarano, G., Giacovazzo, C. & Guagliardi, A.
 (1993) J. Appl. Cryst. 26, 343-350.

 Sheldrick, G.M. SHELXL97. Program for crystal structure
 refinement. University of G\\"ottingen, Germany, 1997.

 Sluis, P. v.d., Spek, A.L. (1990). Acta Cryst. A46, 194-201.

 Spek, A.L. (1990). Acta Cryst. A46, C-34.
;


_publ_section_figure_captions
; ?
;

_publ_section_acknowledgements
; ?
;


#=============================================================================
 # If more than one structure is reported, sections 5-10 should be filled in
 # per structure. For each data set, replace the ? in the data_? line below
 # by a unique identifier.


#=============================================================================
data_w2p2ene 
#compound 7
 
_audit_creation_method            SHELXL-97 
_chemical_name_systematic 
; 
 ? 
; 
_chemical_name_common             ? 
_chemical_melting_point           ? 
_chemical_formula_moiety          ? 
_chemical_formula_sum 
 'C30 H24 O14 P2 W2' 
_chemical_formula_weight          1038.13 
 
loop_ 
 _atom_type_symbol 
 _atom_type_description 
 _atom_type_scat_dispersion_real 
 _atom_type_scat_dispersion_imag 
 _atom_type_scat_source 
 'C'  'C'   0.0033   0.0016 
 'International Tables Vol C Tables 4.2.6.8 and 6.1.1.4' 
 'H'  'H'   0.0000   0.0000 
 'International Tables Vol C Tables 4.2.6.8 and 6.1.1.4' 
 'O'  'O'   0.0106   0.0060 
 'International Tables Vol C Tables 4.2.6.8 and 6.1.1.4' 
 'P'  'P'   0.1023   0.0942 
 'International Tables Vol C Tables 4.2.6.8 and 6.1.1.4' 
 'W'  'W'  -0.8490   6.8722 
 'International Tables Vol C Tables 4.2.6.8 and 6.1.1.4' 
 
_symmetry_cell_setting            'Monoclinic'
_symmetry_space_group_name_H-M    'P21/c     '
 
loop_ 
 _symmetry_equiv_pos_as_xyz 
 'x, y, z' 
 '-x, y+1/2, -z+1/2' 
 '-x, -y, -z' 
 'x, -y-1/2, z-1/2' 
 
_cell_length_a                    17.0670(10) 
_cell_length_b                    13.4710(10) 
_cell_length_c                    16.3210(10) 
_cell_angle_alpha                 90.00 
_cell_angle_beta                  115.1700(10) 
_cell_angle_gamma                 90.00 
_cell_volume                      3396.1(4) 
_cell_formula_units_Z             4 
_cell_measurement_temperature     150.0(1)
_cell_measurement_reflns_used     251
_cell_measurement_theta_min       3.0
_cell_measurement_theta_max       20.0
 
_exptl_crystal_description        'plate'
_exptl_crystal_colour             'colorless'
_exptl_crystal_size_max           0.20 
_exptl_crystal_size_mid           0.14 
_exptl_crystal_size_min           0.12 
_exptl_crystal_density_meas       ? 
_exptl_crystal_density_diffrn     2.030 
_exptl_crystal_density_method     'not measured' 
_exptl_crystal_F_000              1976 
_exptl_absorpt_coefficient_mu     6.930 
_exptl_absorpt_correction_type    'multi-scan'
_exptl_absorpt_correction_T_min   0.3378 
_exptl_absorpt_correction_T_max   0.4902 
_exptl_absorpt_process_details    ? 
 
_exptl_special_details 
; 
 ? 
; 
 
_diffrn_ambient_temperature       150.0(1)
_diffrn_radiation_wavelength      0.71069 
_diffrn_radiation_type            MoK\a 
_diffrn_radiation_source          'fine-focus sealed tube' 
_diffrn_radiation_monochromator   graphite 
_diffrn_measurement_device_type   'KappaCCD'
_diffrn_measurement_method        'phi and omega scans'
_diffrn_detector_area_resol_mean  ? 
_diffrn_standards_number          ? 
_diffrn_standards_interval_count  ? 
_diffrn_standards_interval_time   ? 
_diffrn_standards_decay_%         ? 
_diffrn_reflns_number             16351 
_diffrn_reflns_av_R_equivalents   0.0256 
_diffrn_reflns_av_sigmaI/netI     0.0453 
_diffrn_reflns_limit_h_min        -24 
_diffrn_reflns_limit_h_max        24 
_diffrn_reflns_limit_k_min        -18 
_diffrn_reflns_limit_k_max        16 
_diffrn_reflns_limit_l_min        -22 
_diffrn_reflns_limit_l_max        22 
_diffrn_reflns_theta_min          2.73 
_diffrn_reflns_theta_max          30.03 
_reflns_number_total              9903 
_reflns_number_gt                 7814 
_reflns_threshold_expression      >2sigma(I) 
 
_computing_data_collection        ? 
_computing_cell_refinement        ? 
_computing_data_reduction         ? 
_computing_structure_solution     'SHELXS-97 (Sheldrick, 1990)' 
_computing_structure_refinement   'SHELXL-97 (Sheldrick, 1997)' 
_computing_molecular_graphics     ? 
_computing_publication_material   ? 
 
_refine_special_details 
; 
 Refinement of F^2^ against ALL reflections.  The weighted R-factor wR and 
 goodness of fit S are based on F^2^, conventional R-factors R are based 
 on F, with F set to zero for negative F^2^. The threshold expression of 
 F^2^ > 2sigma(F^2^) is used only for calculating R-factors(gt) etc. and is 
 not relevant to the choice of reflections for refinement.  R-factors based 
 on F^2^ are statistically about twice as large as those based on F, and R- 
 factors based on ALL data will be even larger. 
; 
 
_refine_ls_structure_factor_coef  Fsqd  
_refine_ls_matrix_type            full 
_refine_ls_weighting_scheme       calc  
_refine_ls_weighting_details 
 'calc w=1/[\s^2^(Fo^2^)+(0.0306P)^2^+0.0000P] where P=(Fo^2^+2Fc^2^)/3' 
_atom_sites_solution_primary      direct 
_atom_sites_solution_secondary    difmap 
_atom_sites_solution_hydrogens    geom 
_refine_ls_hydrogen_treatment     mixed 
_refine_ls_extinction_method      none 
_refine_ls_extinction_coef        ? 
_refine_ls_number_reflns          9903 
_refine_ls_number_parameters      437 
_refine_ls_number_restraints      0 
_refine_ls_R_factor_all           0.0439 
_refine_ls_R_factor_gt            0.0290 
_refine_ls_wR_factor_ref          0.0693 
_refine_ls_wR_factor_gt           0.0647 
_refine_ls_goodness_of_fit_ref    1.008 
_refine_ls_restrained_S_all       1.008 
_refine_ls_shift/su_max           0.001 
_refine_ls_shift/su_mean          0.000 
 
loop_ 
 _atom_site_label 
 _atom_site_type_symbol 
 _atom_site_fract_x 
 _atom_site_fract_y 
 _atom_site_fract_z 
 _atom_site_U_iso_or_equiv 
 _atom_site_adp_type 
 _atom_site_occupancy 
 _atom_site_symmetry_multiplicity 
 _atom_site_calc_flag 
 _atom_site_refinement_flags 
 _atom_site_disorder_assembly 
 _atom_site_disorder_group 
W1 W 0.322798(9) 0.135438(10) -0.008536(10) 0.02601(4) Uani 1 1 d . . . 
W2 W 0.085244(9) -0.113198(9) 0.368738(10) 0.02500(4) Uani 1 1 d . . . 
P1 P 0.27824(6) 0.04239(6) 0.09698(6) 0.02292(18) Uani 1 1 d . . . 
P2 P 0.13293(6) -0.10217(6) 0.24600(6) 0.02365(18) Uani 1 1 d . . . 
C1 C 0.3370(2) 0.0525(2) 0.2214(2) 0.0239(7) Uani 1 1 d . . . 
H1 H 0.3396 0.1205 0.2469 0.029 Uiso 1 1 calc R . . 
C2 C 0.4236(2) 0.0096(2) 0.2321(2) 0.0265(7) Uani 1 1 d . . . 
C3 C 0.4116(2) -0.0675(2) 0.1771(2) 0.0268(7) Uani 1 1 d . . . 
C4 C 0.3156(2) -0.0894(2) 0.1239(2) 0.0231(7) Uani 1 1 d . . . 
H4 H 0.2997 -0.1353 0.0712 0.028 Uiso 1 1 calc R . . 
C5 C 0.2804(2) -0.1147(2) 0.1914(2) 0.0227(7) Uani 1 1 d . . . 
C6 C 0.2354(2) -0.1938(2) 0.1926(2) 0.0247(7) Uani 1 1 d . . . 
O7 O 0.19766(14) -0.19657(16) 0.25394(15) 0.0261(5) Uani 1 1 d . . . 
C8 C 0.2892(2) -0.0284(2) 0.2538(2) 0.0220(7) Uani 1 1 d . . . 
C9 C 0.1977(2) 0.0072(2) 0.2429(2) 0.0221(7) Uani 1 1 d . . . 
H9 H 0.2077 0.0477 0.2978 0.026 Uiso 1 1 calc R . . 
C10 C 0.1498(2) 0.0754(2) 0.1604(2) 0.0241(7) Uani 1 1 d . . . 
H10 H 0.0867 0.0685 0.1449 0.029 Uiso 1 1 calc R . . 
C11 C 0.1606(2) 0.0462(2) 0.0753(2) 0.0241(7) Uani 1 1 d . . . 
H11 H 0.1344 0.1017 0.0315 0.029 Uiso 1 1 calc R . . 
C12 C 0.1147(2) -0.0464(2) 0.0267(2) 0.0244(7) Uani 1 1 d . . . 
H12 H 0.1191 -0.0599 -0.0283 0.029 Uiso 1 1 calc R . . 
C13 C 0.0694(2) -0.1117(2) 0.0489(2) 0.0282(7) Uani 1 1 d . . . 
H13 H 0.0463 -0.1651 0.0075 0.034 Uiso 1 1 calc R . . 
C14 C 0.0482(2) -0.1148(2) 0.1304(2) 0.0284(8) Uani 1 1 d . . . 
H14A H 0.0185 -0.1786 0.1276 0.034 Uiso 1 1 calc R . . 
H14B H 0.0053 -0.0617 0.1217 0.034 Uiso 1 1 calc R . . 
C15 C 0.4771(3) -0.1343(3) 0.1672(3) 0.0383(9) Uani 1 1 d . . . 
H15A H 0.4668 -0.1373 0.1034 0.057 Uiso 1 1 calc R . . 
H15B H 0.4721 -0.2011 0.1883 0.057 Uiso 1 1 calc R . . 
H15C H 0.5354 -0.1084 0.2034 0.057 Uiso 1 1 calc R . . 
C16 C 0.5077(2) 0.0516(3) 0.3006(3) 0.0370(9) Uani 1 1 d . . . 
H16A H 0.5561 0.0172 0.2957 0.055 Uiso 1 1 calc R . . 
H16B H 0.5112 0.0424 0.3616 0.055 Uiso 1 1 calc R . . 
H16C H 0.5105 0.1226 0.2890 0.055 Uiso 1 1 calc R . . 
C17 C 0.3457(2) -0.0491(2) 0.3545(2) 0.0261(7) Uani 1 1 d . . . 
O18 O 0.34602(17) 0.00246(19) 0.41444(17) 0.0396(6) Uani 1 1 d . . . 
O19 O 0.39674(17) -0.12770(17) 0.36661(17) 0.0345(6) Uani 1 1 d . . . 
C20 C 0.4565(3) -0.1490(3) 0.4591(3) 0.0431(10) Uani 1 1 d . . . 
H20A H 0.5001 -0.0962 0.4816 0.065 Uiso 1 1 calc R . . 
H20B H 0.4852 -0.2127 0.4615 0.065 Uiso 1 1 calc R . . 
H20C H 0.4248 -0.1524 0.4969 0.065 Uiso 1 1 calc R . . 
O21 O 0.21588(15) -0.27099(15) 0.13575(15) 0.0291(5) Uani 1 1 d . . . 
C22 C 0.2370(3) -0.3666(2) 0.1784(3) 0.0467(11) Uani 1 1 d . . . 
H22A H 0.2972 -0.3665 0.2240 0.070 Uiso 1 1 calc R . . 
H22B H 0.2295 -0.4174 0.1328 0.070 Uiso 1 1 calc R . . 
H22C H 0.1986 -0.3810 0.2077 0.070 Uiso 1 1 calc R . . 
C23 C 0.1726(2) 0.1840(2) 0.1860(3) 0.0304(8) Uani 1 1 d . . . 
H23 H 0.1888 0.1998 0.2478 0.036 Uiso 1 1 calc R . . 
C24 C 0.1728(3) 0.2578(3) 0.1349(3) 0.0422(10) Uani 1 1 d . . . 
H24A H 0.1572 0.2472 0.0723 0.051 Uiso 1 1 calc R . . 
H24B H 0.1885 0.3223 0.1600 0.051 Uiso 1 1 calc R . . 
C25 C 0.4501(3) 0.0977(3) 0.0620(3) 0.0377(9) Uani 1 1 d . . . 
C26 C 0.3013(3) 0.0050(3) -0.0785(3) 0.0376(9) Uani 1 1 d . . . 
C27 C 0.1986(2) 0.1774(3) -0.0851(3) 0.0302(8) Uani 1 1 d . . . 
C28 C 0.3436(2) 0.2600(3) 0.0687(3) 0.0365(9) Uani 1 1 d . . . 
C29 C 0.3558(2) 0.2081(3) -0.0956(3) 0.0352(9) Uani 1 1 d . . . 
C30 C 0.0388(2) -0.2512(3) 0.3215(3) 0.0325(8) Uani 1 1 d . . . 
C31 C 0.2049(3) -0.1738(3) 0.4438(3) 0.0339(8) Uani 1 1 d . . . 
C32 C 0.1360(3) 0.0214(3) 0.4201(3) 0.0353(9) Uani 1 1 d . . . 
C33 C -0.0320(2) -0.0500(3) 0.2901(3) 0.0339(8) Uani 1 1 d . . . 
C34 C 0.0464(2) -0.1241(2) 0.4692(3) 0.0316(8) Uani 1 1 d . . . 
O1 O 0.52210(19) 0.0806(2) 0.0973(2) 0.0583(9) Uani 1 1 d . . . 
O2 O 0.2903(2) -0.0705(2) -0.1131(2) 0.0600(9) Uani 1 1 d . . . 
O3 O 0.3556(2) 0.3295(2) 0.1124(2) 0.0619(9) Uani 1 1 d . . . 
O4 O 0.13043(17) 0.2047(2) -0.13005(19) 0.0435(7) Uani 1 1 d . . . 
O5 O 0.37655(19) 0.2496(2) -0.1445(2) 0.0508(8) Uani 1 1 d . . . 
O6 O 0.01444(19) -0.32925(19) 0.2973(2) 0.0483(8) Uani 1 1 d . . . 
O999 O 0.27169(19) -0.2074(2) 0.4825(2) 0.0532(8) Uani 1 1 d . . . 
O8 O 0.1660(2) 0.0957(2) 0.4518(2) 0.0582(9) Uani 1 1 d . . . 
O9 O -0.09745(18) -0.0160(2) 0.2475(2) 0.0527(8) Uani 1 1 d . . . 
O10 O 0.0232(2) -0.1294(2) 0.5253(2) 0.0477(8) Uani 1 1 d . . . 
 
loop_ 
 _atom_site_aniso_label 
 _atom_site_aniso_U_11 
 _atom_site_aniso_U_22 
 _atom_site_aniso_U_33 
 _atom_site_aniso_U_23 
 _atom_site_aniso_U_13 
 _atom_site_aniso_U_12 
W1 0.02661(8) 0.02821(7) 0.02529(8) 0.00276(5) 0.01304(7) -0.00010(5) 
W2 0.02909(9) 0.02356(7) 0.02574(8) 0.00218(5) 0.01492(7) 0.00125(5) 
P1 0.0254(5) 0.0217(4) 0.0231(5) 0.0003(3) 0.0117(4) 0.0004(3) 
P2 0.0267(5) 0.0226(4) 0.0222(5) 0.0014(3) 0.0110(4) 0.0000(3) 
C1 0.0293(18) 0.0199(14) 0.0229(18) -0.0028(12) 0.0116(15) -0.0004(13) 
C2 0.0279(19) 0.0275(16) 0.0244(19) 0.0026(13) 0.0114(16) 0.0029(13) 
C3 0.0269(18) 0.0288(17) 0.0268(19) 0.0027(14) 0.0133(16) 0.0032(14) 
C4 0.0262(18) 0.0236(15) 0.0195(17) -0.0003(13) 0.0097(15) 0.0006(13) 
C5 0.0226(17) 0.0232(15) 0.0189(17) 0.0003(12) 0.0056(14) 0.0038(12) 
C6 0.0295(19) 0.0236(15) 0.0201(17) 0.0004(13) 0.0095(15) 0.0037(13) 
O7 0.0326(13) 0.0230(11) 0.0267(13) 0.0035(9) 0.0166(11) 0.0039(9) 
C8 0.0234(17) 0.0225(15) 0.0193(17) -0.0006(12) 0.0085(14) 0.0016(12) 
C9 0.0246(17) 0.0211(14) 0.0215(17) -0.0012(12) 0.0108(15) 0.0011(12) 
C10 0.0271(18) 0.0233(15) 0.0245(18) -0.0001(13) 0.0136(15) 0.0003(13) 
C11 0.0228(17) 0.0237(15) 0.0246(18) 0.0025(13) 0.0089(15) 0.0047(13) 
C12 0.0239(17) 0.0299(16) 0.0187(17) 0.0014(13) 0.0083(14) 0.0050(13) 
C13 0.0281(19) 0.0275(16) 0.0219(18) -0.0002(13) 0.0038(16) 0.0017(13) 
C14 0.0283(19) 0.0279(17) 0.0241(19) 0.0027(13) 0.0066(16) -0.0021(13) 
C15 0.036(2) 0.0337(19) 0.047(3) -0.0019(17) 0.019(2) 0.0063(16) 
C16 0.026(2) 0.041(2) 0.039(2) -0.0071(17) 0.0086(18) -0.0021(16) 
C17 0.0296(19) 0.0251(16) 0.0226(18) -0.0010(13) 0.0102(16) -0.0017(13) 
O18 0.0475(17) 0.0421(15) 0.0256(15) -0.0058(11) 0.0120(13) 0.0075(12) 
O19 0.0381(16) 0.0349(13) 0.0226(14) 0.0021(10) 0.0053(12) 0.0131(11) 
C20 0.039(2) 0.045(2) 0.032(2) 0.0032(18) 0.0031(19) 0.0146(18) 
O21 0.0433(15) 0.0198(11) 0.0236(13) -0.0033(9) 0.0138(12) -0.0008(10) 
C22 0.078(3) 0.0224(18) 0.038(2) 0.0022(16) 0.023(2) 0.0030(18) 
C23 0.030(2) 0.0278(17) 0.035(2) -0.0011(15) 0.0152(17) 0.0056(14) 
C24 0.055(3) 0.0277(18) 0.047(3) -0.0004(17) 0.024(2) 0.0005(17) 
C25 0.035(2) 0.042(2) 0.039(2) 0.0091(18) 0.019(2) -0.0014(17) 
C26 0.043(2) 0.041(2) 0.031(2) -0.0025(17) 0.0171(19) 0.0013(17) 
C27 0.034(2) 0.0315(18) 0.028(2) -0.0005(15) 0.0157(17) -0.0059(15) 
C28 0.034(2) 0.0344(19) 0.038(2) -0.0029(17) 0.0119(19) -0.0072(16) 
C29 0.029(2) 0.042(2) 0.037(2) 0.0136(17) 0.0162(18) 0.0080(16) 
C30 0.040(2) 0.0276(17) 0.037(2) -0.0002(15) 0.0235(19) -0.0005(15) 
C31 0.037(2) 0.040(2) 0.033(2) 0.0090(17) 0.0228(19) 0.0043(17) 
C32 0.042(2) 0.0350(19) 0.035(2) -0.0004(16) 0.022(2) -0.0025(16) 
C33 0.034(2) 0.0323(18) 0.037(2) -0.0033(16) 0.0159(19) 0.0006(16) 
C34 0.035(2) 0.0284(17) 0.037(2) 0.0031(15) 0.0204(19) 0.0023(14) 
O1 0.0347(18) 0.070(2) 0.072(2) 0.0276(18) 0.0253(17) 0.0111(15) 
O2 0.076(2) 0.0510(18) 0.055(2) -0.0225(16) 0.0292(19) -0.0010(17) 
O3 0.067(2) 0.0508(18) 0.066(2) -0.0245(17) 0.0262(19) -0.0129(16) 
O4 0.0328(16) 0.0502(17) 0.0407(18) 0.0068(13) 0.0089(14) -0.0007(13) 
O5 0.0503(18) 0.0567(18) 0.058(2) 0.0266(15) 0.0349(17) 0.0141(14) 
O6 0.061(2) 0.0290(13) 0.066(2) -0.0092(13) 0.0376(18) -0.0103(13) 
O999 0.0431(18) 0.072(2) 0.0495(19) 0.0304(16) 0.0242(16) 0.0163(16) 
O8 0.076(2) 0.0374(16) 0.069(2) -0.0203(15) 0.037(2) -0.0205(15) 
O9 0.0359(17) 0.0474(17) 0.064(2) 0.0013(15) 0.0109(16) 0.0121(14) 
O10 0.055(2) 0.0570(18) 0.0431(18) 0.0047(14) 0.0321(17) 0.0048(14) 
 
_geom_special_details 
; 
 All esds (except the esd in the dihedral angle between two l.s. planes) 
 are estimated using the full covariance matrix.  The cell esds are taken 
 into account individually in the estimation of esds in distances, angles 
 and torsion angles; correlations between esds in cell parameters are only 
 used when they are defined by crystal symmetry.  An approximate (isotropic) 
 treatment of cell esds is used for estimating esds involving l.s. planes. 
; 
 
loop_ 
 _geom_bond_atom_site_label_1 
 _geom_bond_atom_site_label_2 
 _geom_bond_distance 
 _geom_bond_site_symmetry_2 
 _geom_bond_publ_flag 
W1 C29 1.994(4) . ? 
W1 C27 2.030(4) . ? 
W1 C28 2.037(4) . ? 
W1 C26 2.041(4) . ? 
W1 C25 2.043(4) . ? 
W1 P1 2.4957(8) . ? 
W2 C34 2.017(4) . ? 
W2 C32 2.031(4) . ? 
W2 C30 2.039(4) . ? 
W2 C33 2.047(4) . ? 
W2 C31 2.052(4) . ? 
W2 P2 2.4665(9) . ? 
P1 C1 1.849(3) . ? 
P1 C4 1.874(3) . ? 
P1 C11 1.886(3) . ? 
P2 O7 1.653(2) . ? 
P2 C14 1.833(4) . ? 
P2 C9 1.856(3) . ? 
C1 C2 1.525(4) . ? 
C1 C8 1.580(4) . ? 
C1 H1 1.0000 . ? 
C2 C3 1.332(5) . ? 
C2 C16 1.505(5) . ? 
C3 C15 1.496(5) . ? 
C3 C4 1.521(5) . ? 
C4 C5 1.501(4) . ? 
C4 H4 1.0000 . ? 
C5 C6 1.318(4) . ? 
C5 C8 1.510(4) . ? 
C6 O21 1.338(4) . ? 
C6 O7 1.403(4) . ? 
C8 C17 1.537(5) . ? 
C8 C9 1.570(4) . ? 
C9 C10 1.545(4) . ? 
C9 H9 1.0000 . ? 
C10 C11 1.527(4) . ? 
C10 C23 1.527(4) . ? 
C10 H10 1.0000 . ? 
C11 C12 1.507(4) . ? 
C11 H11 1.0000 . ? 
C12 C13 1.319(4) . ? 
C12 H12 0.9500 . ? 
C13 C14 1.519(5) . ? 
C13 H13 0.9500 . ? 
C14 H14A 0.9900 . ? 
C14 H14B 0.9900 . ? 
C15 H15A 0.9800 . ? 
C15 H15B 0.9800 . ? 
C15 H15C 0.9800 . ? 
C16 H16A 0.9800 . ? 
C16 H16B 0.9800 . ? 
C16 H16C 0.9800 . ? 
C17 O18 1.197(4) . ? 
C17 O19 1.331(4) . ? 
O19 C20 1.447(4) . ? 
C20 H20A 0.9800 . ? 
C20 H20B 0.9800 . ? 
C20 H20C 0.9800 . ? 
O21 C22 1.435(4) . ? 
C22 H22A 0.9800 . ? 
C22 H22B 0.9800 . ? 
C22 H22C 0.9800 . ? 
C23 C24 1.298(5) . ? 
C23 H23 0.9500 . ? 
C24 H24A 0.9500 . ? 
C24 H24B 0.9500 . ? 
C25 O1 1.138(4) . ? 
C26 O2 1.140(4) . ? 
C27 O4 1.141(4) . ? 
C28 O3 1.141(4) . ? 
C29 O5 1.146(4) . ? 
C30 O6 1.138(4) . ? 
C31 O999 1.136(4) . ? 
C32 O8 1.142(4) . ? 
C33 O9 1.132(4) . ? 
C34 O10 1.145(4) . ? 
 
loop_ 
 _geom_angle_atom_site_label_1 
 _geom_angle_atom_site_label_2 
 _geom_angle_atom_site_label_3 
 _geom_angle 
 _geom_angle_site_symmetry_1 
 _geom_angle_site_symmetry_3 
 _geom_angle_publ_flag 
C29 W1 C27 87.85(14) . . ? 
C29 W1 C28 90.53(15) . . ? 
C27 W1 C28 90.76(14) . . ? 
C29 W1 C26 93.54(16) . . ? 
C27 W1 C26 90.18(15) . . ? 
C28 W1 C26 175.85(15) . . ? 
C29 W1 C25 88.22(14) . . ? 
C27 W1 C25 176.06(14) . . ? 
C28 W1 C25 89.56(16) . . ? 
C26 W1 C25 89.78(16) . . ? 
C29 W1 P1 178.48(12) . . ? 
C27 W1 P1 91.12(10) . . ? 
C28 W1 P1 90.61(11) . . ? 
C26 W1 P1 85.34(11) . . ? 
C25 W1 P1 92.80(10) . . ? 
C34 W2 C32 87.68(14) . . ? 
C34 W2 C30 91.82(14) . . ? 
C32 W2 C30 177.51(16) . . ? 
C34 W2 C33 88.17(15) . . ? 
C32 W2 C33 91.08(15) . . ? 
C30 W2 C33 91.34(14) . . ? 
C34 W2 C31 94.24(15) . . ? 
C32 W2 C31 88.14(15) . . ? 
C30 W2 C31 89.47(15) . . ? 
C33 W2 C31 177.43(14) . . ? 
C34 W2 P2 179.29(9) . . ? 
C32 W2 P2 92.93(10) . . ? 
C30 W2 P2 87.56(10) . . ? 
C33 W2 P2 92.19(10) . . ? 
C31 W2 P2 85.41(10) . . ? 
C1 P1 C4 80.79(14) . . ? 
C1 P1 C11 103.95(14) . . ? 
C4 P1 C11 107.38(14) . . ? 
C1 P1 W1 122.62(10) . . ? 
C4 P1 W1 117.67(10) . . ? 
C11 P1 W1 118.02(11) . . ? 
O7 P2 C14 102.57(14) . . ? 
O7 P2 C9 103.12(13) . . ? 
C14 P2 C9 105.28(15) . . ? 
O7 P2 W2 109.29(8) . . ? 
C14 P2 W2 116.26(12) . . ? 
C9 P2 W2 118.43(10) . . ? 
C2 C1 C8 108.3(2) . . ? 
C2 C1 P1 98.3(2) . . ? 
C8 C1 P1 101.6(2) . . ? 
C2 C1 H1 115.5 . . ? 
C8 C1 H1 115.5 . . ? 
P1 C1 H1 115.5 . . ? 
C3 C2 C16 128.2(3) . . ? 
C3 C2 C1 110.8(3) . . ? 
C16 C2 C1 121.0(3) . . ? 
C2 C3 C15 129.4(3) . . ? 
C2 C3 C4 110.7(3) . . ? 
C15 C3 C4 119.7(3) . . ? 
C5 C4 C3 107.2(3) . . ? 
C5 C4 P1 100.7(2) . . ? 
C3 C4 P1 97.3(2) . . ? 
C5 C4 H4 116.3 . . ? 
C3 C4 H4 116.3 . . ? 
P1 C4 H4 116.3 . . ? 
C6 C5 C4 127.8(3) . . ? 
C6 C5 C8 120.3(3) . . ? 
C4 C5 C8 111.3(3) . . ? 
C5 C6 O21 126.3(3) . . ? 
C5 C6 O7 118.7(3) . . ? 
O21 C6 O7 114.8(3) . . ? 
C6 O7 P2 114.73(19) . . ? 
C5 C8 C17 114.7(3) . . ? 
C5 C8 C9 110.5(3) . . ? 
C17 C8 C9 108.5(2) . . ? 
C5 C8 C1 102.9(2) . . ? 
C17 C8 C1 107.7(3) . . ? 
C9 C8 C1 112.5(2) . . ? 
C10 C9 C8 114.3(2) . . ? 
C10 C9 P2 113.3(2) . . ? 
C8 C9 P2 109.3(2) . . ? 
C10 C9 H9 106.5 . . ? 
C8 C9 H9 106.5 . . ? 
P2 C9 H9 106.5 . . ? 
C11 C10 C23 112.4(3) . . ? 
C11 C10 C9 114.6(3) . . ? 
C23 C10 C9 110.6(3) . . ? 
C11 C10 H10 106.2 . . ? 
C23 C10 H10 106.2 . . ? 
C9 C10 H10 106.2 . . ? 
C12 C11 C10 117.1(3) . . ? 
C12 C11 P1 110.5(2) . . ? 
C10 C11 P1 111.5(2) . . ? 
C12 C11 H11 105.6 . . ? 
C10 C11 H11 105.6 . . ? 
P1 C11 H11 105.6 . . ? 
C13 C12 C11 129.8(3) . . ? 
C13 C12 H12 115.1 . . ? 
C11 C12 H12 115.1 . . ? 
C12 C13 C14 130.1(3) . . ? 
C12 C13 H13 115.0 . . ? 
C14 C13 H13 115.0 . . ? 
C13 C14 P2 121.4(2) . . ? 
C13 C14 H14A 107.0 . . ? 
P2 C14 H14A 107.0 . . ? 
C13 C14 H14B 107.0 . . ? 
P2 C14 H14B 107.0 . . ? 
H14A C14 H14B 106.7 . . ? 
C3 C15 H15A 109.5 . . ? 
C3 C15 H15B 109.5 . . ? 
H15A C15 H15B 109.5 . . ? 
C3 C15 H15C 109.5 . . ? 
H15A C15 H15C 109.5 . . ? 
H15B C15 H15C 109.5 . . ? 
C2 C16 H16A 109.5 . . ? 
C2 C16 H16B 109.5 . . ? 
H16A C16 H16B 109.5 . . ? 
C2 C16 H16C 109.5 . . ? 
H16A C16 H16C 109.5 . . ? 
H16B C16 H16C 109.5 . . ? 
O18 C17 O19 124.4(3) . . ? 
O18 C17 C8 123.4(3) . . ? 
O19 C17 C8 112.1(3) . . ? 
C17 O19 C20 116.0(3) . . ? 
O19 C20 H20A 109.5 . . ? 
O19 C20 H20B 109.5 . . ? 
H20A C20 H20B 109.5 . . ? 
O19 C20 H20C 109.5 . . ? 
H20A C20 H20C 109.5 . . ? 
H20B C20 H20C 109.5 . . ? 
C6 O21 C22 115.0(3) . . ? 
O21 C22 H22A 109.5 . . ? 
O21 C22 H22B 109.5 . . ? 
H22A C22 H22B 109.5 . . ? 
O21 C22 H22C 109.5 . . ? 
H22A C22 H22C 109.5 . . ? 
H22B C22 H22C 109.5 . . ? 
C24 C23 C10 128.9(3) . . ? 
C24 C23 H23 115.6 . . ? 
C10 C23 H23 115.6 . . ? 
C23 C24 H24A 120.0 . . ? 
C23 C24 H24B 120.0 . . ? 
H24A C24 H24B 120.0 . . ? 
O1 C25 W1 175.3(3) . . ? 
O2 C26 W1 176.2(3) . . ? 
O4 C27 W1 176.4(3) . . ? 
O3 C28 W1 179.6(5) . . ? 
O5 C29 W1 178.6(3) . . ? 
O6 C30 W2 178.2(4) . . ? 
O999 C31 W2 177.5(3) . . ? 
O8 C32 W2 177.6(4) . . ? 
O9 C33 W2 178.8(3) . . ? 
O10 C34 W2 178.9(3) . . ? 
 
_diffrn_measured_fraction_theta_max    0.997 
_diffrn_reflns_theta_full              30.03 
_diffrn_measured_fraction_theta_full   0.997 
_refine_diff_density_max    1.300 
_refine_diff_density_min   -1.512 
_refine_diff_density_rms    0.142 
#END=== 
data_bicyclo7 
#compound 9
 
_audit_creation_method            SHELXL-97 
_chemical_name_systematic 
; 
 ? 
; 
_chemical_name_common             ? 
_chemical_melting_point           ? 
_chemical_formula_moiety          ? 
_chemical_formula_sum 
 'C21 H25 O5 P W' 
_chemical_formula_weight          572.23 
 
loop_ 
 _atom_type_symbol 
 _atom_type_description 
 _atom_type_scat_dispersion_real 
 _atom_type_scat_dispersion_imag 
 _atom_type_scat_source 
 'C'  'C'   0.0033   0.0016 
 'International Tables Vol C Tables 4.2.6.8 and 6.1.1.4' 
 'H'  'H'   0.0000   0.0000 
 'International Tables Vol C Tables 4.2.6.8 and 6.1.1.4' 
 'O'  'O'   0.0106   0.0060 
 'International Tables Vol C Tables 4.2.6.8 and 6.1.1.4' 
 'P'  'P'   0.1023   0.0942 
 'International Tables Vol C Tables 4.2.6.8 and 6.1.1.4' 
 'W'  'W'  -0.8490   6.8722 
 'International Tables Vol C Tables 4.2.6.8 and 6.1.1.4' 
 
_symmetry_cell_setting            'Triclinic'
_symmetry_space_group_name_H-M    'P-1     '
 
loop_ 
 _symmetry_equiv_pos_as_xyz 
 'x, y, z' 
 '-x, -y, -z' 
 
_cell_length_a                    8.3200(10) 
_cell_length_b                    10.2930(10) 
_cell_length_c                    14.1890(10) 
_cell_angle_alpha                 91.3990(10) 
_cell_angle_beta                  95.9020(10) 
_cell_angle_gamma                 112.7390(10) 
_cell_volume                      1112.00(19) 
_cell_formula_units_Z             2 
_cell_measurement_temperature     150.0(1)
_cell_measurement_reflns_used     3775
_cell_measurement_theta_min        0.998
_cell_measurement_theta_max       30.034
 
_exptl_crystal_description        'plate'
_exptl_crystal_colour             'colorless'
_exptl_crystal_size_max           0.20 
_exptl_crystal_size_mid           0.20 
_exptl_crystal_size_min           0.14 
_exptl_crystal_density_meas       ? 
_exptl_crystal_density_diffrn     1.709 
_exptl_crystal_density_method     'not measured' 
_exptl_crystal_F_000              560 
_exptl_absorpt_coefficient_mu     5.293 
_exptl_absorpt_correction_type    'multi-scan'
_exptl_absorpt_correction_T_min   0.4174 
_exptl_absorpt_correction_T_max   0.5245 
_exptl_absorpt_process_details    ? 
 
_exptl_special_details 
; 
 ? 
; 
 
_diffrn_ambient_temperature       150.0(1)
_diffrn_radiation_wavelength      0.71069 
_diffrn_radiation_type            MoK\a 
_diffrn_radiation_source          'fine-focus sealed tube' 
_diffrn_radiation_monochromator   graphite 
_diffrn_measurement_device_type   'KappaCCD'
_diffrn_measurement_method        'phi and omega scans'
_diffrn_detector_area_resol_mean  ? 
_diffrn_standards_number          ? 
_diffrn_standards_interval_count  ? 
_diffrn_standards_interval_time   ? 
_diffrn_standards_decay_%         ? 
_diffrn_reflns_number             9450 
_diffrn_reflns_av_R_equivalents   0.0190 
_diffrn_reflns_av_sigmaI/netI     0.0343 
_diffrn_reflns_limit_h_min        -11 
_diffrn_reflns_limit_h_max        11 
_diffrn_reflns_limit_k_min        -14 
_diffrn_reflns_limit_k_max        14 
_diffrn_reflns_limit_l_min        -19 
_diffrn_reflns_limit_l_max        19 
_diffrn_reflns_theta_min          3.48 
_diffrn_reflns_theta_max          29.99 
_reflns_number_total              6434 
_reflns_number_gt                 6049 
_reflns_threshold_expression      >2sigma(I) 
 
_computing_data_collection        ? 
_computing_cell_refinement        ? 
_computing_data_reduction         ? 
_computing_structure_solution     'SHELXS-97 (Sheldrick, 1990)' 
_computing_structure_refinement   'SHELXL-97 (Sheldrick, 1997)' 
_computing_molecular_graphics     ? 
_computing_publication_material   ? 
 
_refine_special_details 
; 
 Refinement of F^2^ against ALL reflections.  The weighted R-factor wR and 
 goodness of fit S are based on F^2^, conventional R-factors R are based 
 on F, with F set to zero for negative F^2^. The threshold expression of 
 F^2^ > 2sigma(F^2^) is used only for calculating R-factors(gt) etc. and is 
 not relevant to the choice of reflections for refinement.  R-factors based 
 on F^2^ are statistically about twice as large as those based on F, and R- 
 factors based on ALL data will be even larger. 
; 
 
_refine_ls_structure_factor_coef  Fsqd  
_refine_ls_matrix_type            full 
_refine_ls_weighting_scheme       calc  
_refine_ls_weighting_details 
 'calc w=1/[\s^2^(Fo^2^)+(0.0366P)^2^+0.0332P] where P=(Fo^2^+2Fc^2^)/3' 
_atom_sites_solution_primary      direct 
_atom_sites_solution_secondary    difmap 
_atom_sites_solution_hydrogens    geom 
_refine_ls_hydrogen_treatment     mixed 
_refine_ls_extinction_method      none 
_refine_ls_extinction_coef        ? 
_refine_ls_number_reflns          6434 
_refine_ls_number_parameters      257 
_refine_ls_number_restraints      0 
_refine_ls_R_factor_all           0.0261 
_refine_ls_R_factor_gt            0.0241 
_refine_ls_wR_factor_ref          0.0629 
_refine_ls_wR_factor_gt           0.0618 
_refine_ls_goodness_of_fit_ref    1.058 
_refine_ls_restrained_S_all       1.058 
_refine_ls_shift/su_max           0.001 
_refine_ls_shift/su_mean          0.000 
 
loop_ 
 _atom_site_label 
 _atom_site_type_symbol 
 _atom_site_fract_x 
 _atom_site_fract_y 
 _atom_site_fract_z 
 _atom_site_U_iso_or_equiv 
 _atom_site_adp_type 
 _atom_site_occupancy 
 _atom_site_symmetry_multiplicity 
 _atom_site_calc_flag 
 _atom_site_refinement_flags 
 _atom_site_disorder_assembly 
 _atom_site_disorder_group 
W1 W 0.370523(11) 0.485368(8) 0.254668(5) 0.02249(4) Uani 1 1 d . . . 
P1 P 0.55565(8) 0.74519(6) 0.28677(4) 0.01797(11) Uani 1 1 d . . . 
O1 O 0.6121(4) 0.4483(3) 0.43132(18) 0.0516(6) Uani 1 1 d . . . 
O2 O 0.6155(4) 0.4514(3) 0.10561(19) 0.0517(6) Uani 1 1 d . . . 
O3 O 0.1569(3) 0.1558(2) 0.23173(17) 0.0517(6) Uani 1 1 d . . . 
O4 O 0.1351(4) 0.5381(3) 0.08051(18) 0.0449(6) Uani 1 1 d . . . 
O5 O 0.1034(4) 0.5254(3) 0.38658(19) 0.0453(6) Uani 1 1 d . . . 
C1 C 0.7924(3) 0.7919(2) 0.30111(16) 0.0226(4) Uani 1 1 d . . . 
H1A H 0.8518 0.8865 0.3350 0.027 Uiso 1 1 calc R . . 
H1B H 0.8191 0.7235 0.3410 0.027 Uiso 1 1 calc R . . 
C2 C 0.8660(3) 0.7932(2) 0.20757(17) 0.0253(4) Uani 1 1 d . . . 
C3 C 0.7846(3) 0.8007(2) 0.12330(17) 0.0262(5) Uani 1 1 d . . . 
C4 C 0.6078(3) 0.8114(2) 0.10703(15) 0.0240(4) Uani 1 1 d . . . 
H4A H 0.5186 0.7170 0.0838 0.029 Uiso 1 1 calc R . . 
H4B H 0.6115 0.8758 0.0558 0.029 Uiso 1 1 calc R . . 
C5 C 0.5460(3) 0.8639(2) 0.19327(15) 0.0208(4) Uani 1 1 d . . . 
H5 H 0.4200 0.8484 0.1761 0.025 Uiso 1 1 calc R . . 
C6 C 0.6510(3) 1.0243(2) 0.21829(18) 0.0234(4) Uani 1 1 d . . . 
H6 H 0.7783 1.0419 0.2322 0.028 Uiso 1 1 calc R . . 
C7 C 0.5933(4) 1.0798(3) 0.30618(19) 0.0292(5) Uani 1 1 d . . . 
H7A H 0.6090 1.1791 0.2985 0.035 Uiso 1 1 calc R . . 
H7B H 0.4667 1.0240 0.3084 0.035 Uiso 1 1 calc R . . 
C8 C 0.6940(3) 1.0722(2) 0.39956(18) 0.0278(5) Uani 1 1 d . . . 
C9 C 0.6549(3) 0.9509(3) 0.44148(16) 0.0251(4) Uani 1 1 d . . . 
C10 C 0.5098(3) 0.8173(3) 0.39636(17) 0.0241(5) Uani 1 1 d . . . 
H10A H 0.4021 0.8360 0.3817 0.029 Uiso 1 1 calc R . . 
H10B H 0.4853 0.7444 0.4432 0.029 Uiso 1 1 calc R . . 
C11 C 1.0457(4) 0.7878(4) 0.2202(2) 0.0395(7) Uani 1 1 d . . . 
H11A H 1.1002 0.8129 0.1616 0.059 Uiso 1 1 calc R . . 
H11B H 1.0344 0.6922 0.2344 0.059 Uiso 1 1 calc R . . 
H11C H 1.1190 0.8549 0.2728 0.059 Uiso 1 1 calc R . . 
C12 C 0.8583(5) 0.7939(3) 0.0313(2) 0.0426(7) Uani 1 1 d . . . 
H12A H 0.9088 0.8890 0.0088 0.064 Uiso 1 1 calc R . . 
H12B H 0.7642 0.7322 -0.0164 0.064 Uiso 1 1 calc R . . 
H12C H 0.9498 0.7562 0.0418 0.064 Uiso 1 1 calc R . . 
C13 C 0.6283(4) 1.1052(3) 0.13464(19) 0.0325(5) Uani 1 1 d . . . 
H13 H 0.5123 1.0950 0.1118 0.039 Uiso 1 1 calc R . . 
C14 C 0.7571(5) 1.1890(3) 0.0908(2) 0.0416(7) Uani 1 1 d . . . 
H14A H 0.8748 1.2017 0.1116 0.050 Uiso 1 1 calc R . . 
H14B H 0.7325 1.2367 0.0383 0.050 Uiso 1 1 calc R . . 
C15 C 0.8439(4) 1.2073(3) 0.4351(2) 0.0416(7) Uani 1 1 d . . . 
H15A H 0.9000 1.1948 0.4964 0.062 Uiso 1 1 calc R . . 
H15B H 0.8000 1.2822 0.4429 0.062 Uiso 1 1 calc R . . 
H15C H 0.9297 1.2335 0.3893 0.062 Uiso 1 1 calc R . . 
C16 C 0.7516(4) 0.9297(3) 0.53198(18) 0.0357(6) Uani 1 1 d . . . 
H16A H 0.8115 0.8676 0.5178 0.054 Uiso 1 1 calc R . . 
H16B H 0.6677 0.8867 0.5771 0.054 Uiso 1 1 calc R . . 
H16C H 0.8382 1.0212 0.5598 0.054 Uiso 1 1 calc R . . 
C17 C 0.5252(4) 0.4604(3) 0.3674(2) 0.0312(5) Uani 1 1 d . . . 
C18 C 0.5324(4) 0.4652(3) 0.1610(2) 0.0325(6) Uani 1 1 d . . . 
C19 C 0.2334(4) 0.2760(3) 0.2397(2) 0.0342(6) Uani 1 1 d . . . 
C20 C 0.2196(4) 0.5189(3) 0.14268(19) 0.0282(5) Uani 1 1 d . . . 
C21 C 0.2003(4) 0.5096(3) 0.34066(19) 0.0289(5) Uani 1 1 d . . . 
 
loop_ 
 _atom_site_aniso_label 
 _atom_site_aniso_U_11 
 _atom_site_aniso_U_22 
 _atom_site_aniso_U_33 
 _atom_site_aniso_U_23 
 _atom_site_aniso_U_13 
 _atom_site_aniso_U_12 
W1 0.02652(6) 0.01676(6) 0.02122(6) 0.00023(4) -0.00175(4) 0.00645(4) 
P1 0.0187(3) 0.0175(2) 0.0167(2) 0.0009(2) 0.00077(19) 0.0064(2) 
O1 0.0622(17) 0.0547(15) 0.0419(13) 0.0122(11) -0.0076(11) 0.0302(13) 
O2 0.0648(17) 0.0373(12) 0.0582(15) -0.0053(11) 0.0232(13) 0.0223(12) 
O3 0.0582(16) 0.0223(9) 0.0609(15) 0.0014(10) -0.0087(12) 0.0048(10) 
O4 0.0472(14) 0.0477(14) 0.0356(12) 0.0004(10) -0.0122(10) 0.0183(11) 
O5 0.0412(14) 0.0378(12) 0.0498(14) 0.0011(10) 0.0161(11) 0.0052(10) 
C1 0.0207(11) 0.0247(10) 0.0227(10) -0.0005(8) -0.0012(8) 0.0103(9) 
C2 0.0218(11) 0.0240(10) 0.0310(12) -0.0044(9) 0.0052(9) 0.0099(9) 
C3 0.0281(12) 0.0226(10) 0.0267(11) -0.0033(9) 0.0090(9) 0.0075(9) 
C4 0.0254(12) 0.0262(11) 0.0188(10) 0.0018(8) 0.0007(8) 0.0087(9) 
C5 0.0180(10) 0.0213(10) 0.0230(10) 0.0050(8) 0.0010(8) 0.0077(8) 
C6 0.0238(11) 0.0212(10) 0.0283(11) 0.0061(8) 0.0073(9) 0.0109(9) 
C7 0.0327(14) 0.0224(11) 0.0373(13) 0.0027(10) 0.0111(11) 0.0144(10) 
C8 0.0263(12) 0.0242(11) 0.0311(12) -0.0079(9) 0.0100(10) 0.0070(10) 
C9 0.0240(12) 0.0275(11) 0.0208(10) -0.0065(8) 0.0041(8) 0.0068(9) 
C10 0.0256(12) 0.0217(10) 0.0215(11) -0.0005(8) 0.0068(9) 0.0047(9) 
C11 0.0266(14) 0.0495(17) 0.0462(17) -0.0082(13) 0.0023(12) 0.0203(13) 
C12 0.0453(18) 0.0464(17) 0.0357(15) -0.0024(12) 0.0163(13) 0.0152(14) 
C13 0.0341(14) 0.0321(13) 0.0384(14) 0.0132(11) 0.0079(11) 0.0192(11) 
C14 0.0475(19) 0.0374(15) 0.0452(17) 0.0191(13) 0.0166(14) 0.0187(14) 
C15 0.0401(17) 0.0249(13) 0.0519(18) -0.0094(12) 0.0107(14) 0.0035(12) 
C16 0.0363(15) 0.0427(15) 0.0249(12) -0.0042(10) 0.0011(10) 0.0130(13) 
C17 0.0402(16) 0.0255(12) 0.0276(12) 0.0042(10) -0.0031(11) 0.0141(11) 
C18 0.0374(15) 0.0225(12) 0.0379(14) -0.0031(10) 0.0044(12) 0.0122(11) 
C19 0.0434(16) 0.0228(12) 0.0326(14) 0.0011(10) -0.0045(11) 0.0109(11) 
C20 0.0319(14) 0.0254(12) 0.0236(12) -0.0020(9) -0.0040(10) 0.0093(11) 
C21 0.0290(13) 0.0234(11) 0.0288(12) 0.0020(9) 0.0053(10) 0.0037(10) 
 
_geom_special_details 
; 
 All esds (except the esd in the dihedral angle between two l.s. planes) 
 are estimated using the full covariance matrix.  The cell esds are taken 
 into account individually in the estimation of esds in distances, angles 
 and torsion angles; correlations between esds in cell parameters are only 
 used when they are defined by crystal symmetry.  An approximate (isotropic) 
 treatment of cell esds is used for estimating esds involving l.s. planes. 
; 
 
loop_ 
 _geom_bond_atom_site_label_1 
 _geom_bond_atom_site_label_2 
 _geom_bond_distance 
 _geom_bond_site_symmetry_2 
 _geom_bond_publ_flag 
W1 C19 2.004(3) . ? 
W1 C17 2.034(3) . ? 
W1 C21 2.042(3) . ? 
W1 C20 2.043(3) . ? 
W1 C18 2.048(3) . ? 
W1 P1 2.5187(6) . ? 
P1 C1 1.826(2) . ? 
P1 C5 1.842(2) . ? 
P1 C10 1.844(2) . ? 
O1 C17 1.140(4) . ? 
O2 C18 1.140(4) . ? 
O3 C19 1.149(3) . ? 
O4 C20 1.140(4) . ? 
O5 C21 1.143(4) . ? 
C1 C2 1.516(3) . ? 
C1 H1A 0.9900 . ? 
C1 H1B 0.9900 . ? 
C2 C3 1.331(3) . ? 
C2 C11 1.510(4) . ? 
C3 C12 1.509(3) . ? 
C3 C4 1.512(3) . ? 
C4 C5 1.538(3) . ? 
C4 H4A 0.9900 . ? 
C4 H4B 0.9900 . ? 
C5 C6 1.551(3) . ? 
C5 H5 1.0000 . ? 
C6 C13 1.504(3) . ? 
C6 C7 1.553(3) . ? 
C6 H6 1.0000 . ? 
C7 C8 1.513(4) . ? 
C7 H7A 0.9900 . ? 
C7 H7B 0.9900 . ? 
C8 C9 1.334(3) . ? 
C8 C15 1.496(4) . ? 
C9 C10 1.508(3) . ? 
C9 C16 1.510(3) . ? 
C10 H10A 0.9900 . ? 
C10 H10B 0.9900 . ? 
C11 H11A 0.9800 . ? 
C11 H11B 0.9800 . ? 
C11 H11C 0.9800 . ? 
C12 H12A 0.9800 . ? 
C12 H12B 0.9800 . ? 
C12 H12C 0.9800 . ? 
C13 C14 1.315(4) . ? 
C13 H13 0.9500 . ? 
C14 H14A 0.9500 . ? 
C14 H14B 0.9500 . ? 
C15 H15A 0.9800 . ? 
C15 H15B 0.9800 . ? 
C15 H15C 0.9800 . ? 
C16 H16A 0.9800 . ? 
C16 H16B 0.9800 . ? 
C16 H16C 0.9800 . ? 
 
loop_ 
 _geom_angle_atom_site_label_1 
 _geom_angle_atom_site_label_2 
 _geom_angle_atom_site_label_3 
 _geom_angle 
 _geom_angle_site_symmetry_1 
 _geom_angle_site_symmetry_3 
 _geom_angle_publ_flag 
C19 W1 C17 89.98(11) . . ? 
C19 W1 C21 91.02(12) . . ? 
C17 W1 C21 91.78(12) . . ? 
C19 W1 C20 92.28(11) . . ? 
C17 W1 C20 177.70(9) . . ? 
C21 W1 C20 87.78(11) . . ? 
C19 W1 C18 89.63(12) . . ? 
C17 W1 C18 92.06(12) . . ? 
C21 W1 C18 176.10(9) . . ? 
C20 W1 C18 88.36(12) . . ? 
C19 W1 P1 175.08(8) . . ? 
C17 W1 P1 85.16(8) . . ? 
C21 W1 P1 88.35(8) . . ? 
C20 W1 P1 92.57(8) . . ? 
C18 W1 P1 91.32(8) . . ? 
C1 P1 C5 98.14(10) . . ? 
C1 P1 C10 105.54(11) . . ? 
C5 P1 C10 106.85(11) . . ? 
C1 P1 W1 115.05(8) . . ? 
C5 P1 W1 118.06(8) . . ? 
C10 P1 W1 111.73(8) . . ? 
C2 C1 P1 113.19(16) . . ? 
C2 C1 H1A 108.9 . . ? 
P1 C1 H1A 108.9 . . ? 
C2 C1 H1B 108.9 . . ? 
P1 C1 H1B 108.9 . . ? 
H1A C1 H1B 107.8 . . ? 
C3 C2 C11 123.0(2) . . ? 
C3 C2 C1 124.6(2) . . ? 
C11 C2 C1 112.4(2) . . ? 
C2 C3 C12 122.8(2) . . ? 
C2 C3 C4 125.2(2) . . ? 
C12 C3 C4 112.0(2) . . ? 
C3 C4 C5 116.44(19) . . ? 
C3 C4 H4A 108.2 . . ? 
C5 C4 H4A 108.2 . . ? 
C3 C4 H4B 108.2 . . ? 
C5 C4 H4B 108.2 . . ? 
H4A C4 H4B 107.3 . . ? 
C4 C5 C6 111.57(18) . . ? 
C4 C5 P1 105.18(14) . . ? 
C6 C5 P1 116.60(16) . . ? 
C4 C5 H5 107.7 . . ? 
C6 C5 H5 107.7 . . ? 
P1 C5 H5 107.7 . . ? 
C13 C6 C5 109.6(2) . . ? 
C13 C6 C7 108.99(18) . . ? 
C5 C6 C7 112.7(2) . . ? 
C13 C6 H6 108.5 . . ? 
C5 C6 H6 108.5 . . ? 
C7 C6 H6 108.5 . . ? 
C8 C7 C6 113.80(19) . . ? 
C8 C7 H7A 108.8 . . ? 
C6 C7 H7A 108.8 . . ? 
C8 C7 H7B 108.8 . . ? 
C6 C7 H7B 108.8 . . ? 
H7A C7 H7B 107.7 . . ? 
C9 C8 C15 124.5(3) . . ? 
C9 C8 C7 121.0(2) . . ? 
C15 C8 C7 114.4(2) . . ? 
C8 C9 C10 120.7(2) . . ? 
C8 C9 C16 125.5(2) . . ? 
C10 C9 C16 113.7(2) . . ? 
C9 C10 P1 115.13(17) . . ? 
C9 C10 H10A 108.5 . . ? 
P1 C10 H10A 108.5 . . ? 
C9 C10 H10B 108.5 . . ? 
P1 C10 H10B 108.5 . . ? 
H10A C10 H10B 107.5 . . ? 
C2 C11 H11A 109.5 . . ? 
C2 C11 H11B 109.5 . . ? 
H11A C11 H11B 109.5 . . ? 
C2 C11 H11C 109.5 . . ? 
H11A C11 H11C 109.5 . . ? 
H11B C11 H11C 109.5 . . ? 
C3 C12 H12A 109.5 . . ? 
C3 C12 H12B 109.5 . . ? 
H12A C12 H12B 109.5 . . ? 
C3 C12 H12C 109.5 . . ? 
H12A C12 H12C 109.5 . . ? 
H12B C12 H12C 109.5 . . ? 
C14 C13 C6 124.8(3) . . ? 
C14 C13 H13 117.6 . . ? 
C6 C13 H13 117.6 . . ? 
C13 C14 H14A 120.0 . . ? 
C13 C14 H14B 120.0 . . ? 
H14A C14 H14B 120.0 . . ? 
C8 C15 H15A 109.5 . . ? 
C8 C15 H15B 109.5 . . ? 
H15A C15 H15B 109.5 . . ? 
C8 C15 H15C 109.5 . . ? 
H15A C15 H15C 109.5 . . ? 
H15B C15 H15C 109.5 . . ? 
C9 C16 H16A 109.5 . . ? 
C9 C16 H16B 109.5 . . ? 
H16A C16 H16B 109.5 . . ? 
C9 C16 H16C 109.5 . . ? 
H16A C16 H16C 109.5 . . ? 
H16B C16 H16C 109.5 . . ? 
O1 C17 W1 179.0(3) . . ? 
O2 C18 W1 176.7(3) . . ? 
O3 C19 W1 179.0(3) . . ? 
O4 C20 W1 179.6(3) . . ? 
O5 C21 W1 177.8(3) . . ? 
 
_diffrn_measured_fraction_theta_max    0.992 
_diffrn_reflns_theta_full              29.99 
_diffrn_measured_fraction_theta_full   0.992 
_refine_diff_density_max    1.113 
_refine_diff_density_min   -1.575 
_refine_diff_density_rms    0.113 
#END===
